# Supplementary material
Source: ML conference proceedings conference paper supplement (https://openaccess.thecvf.com/content/CVPR2022/html/Chen_Frame-Wise_Action_Representations_CVPR_2022_paper.html)
Supplement: Supplementary file 2 [file Chen_Frame-Wise_Action_Representations_CVPR_2022_supplemental.zip]

Archive with 4 entries (4 files):
- supp/06385-supp.pdf
- supp/visual_alignment_finegym.mp4
- supp/visual_alignment_pennaction.mp4
- supp/visual_alignment_pouring.mp4
